# Supplementary material for: T cells responding to Trypanosoma cruzi detected by membrane TNF‐α and CD154 in chagasic patients
Source: PubMed Central journal article supplement (PMC5818450; doi:10.1002/iid3.197), 2017-10-01
Supplement: IID3-6-47-s002.pdf [file IID3-6-47-s002.pdf]

**T cells responding to *T. cruzi* detected by membrane TNF- $\alpha$  and CD154 in chagasic patients**

Juan G. Ripoll<sup>1</sup>, Nicolás A. Giraldo<sup>1#a</sup>, Natalia I. Bolaños<sup>1</sup>, Nubia Roa<sup>2</sup>, Fernando Rosas<sup>3</sup>, Adriana Cuéllar<sup>4</sup>, Concepción J. Puerta<sup>5</sup>, John M. González<sup>1\*</sup>

<sup>1</sup> Grupo de Ciencias Básicas Médicas, Facultad de Medicina, Universidad de los Andes, Bogotá, Colombia. Address: Cra 1 # 18A-12. Phone Number: (571) 3394949 Ext. 3900.

<sup>2</sup> Facultad de Medicina, Pontificia Universidad Javeriana and Hospital Universitario San Ignacio, Bogotá, Colombia. Address: Cra. 7 No. 40-62. Phone number: (571) 320 8320 Ext. 2745 – 2777.

<sup>3</sup> Clínica Abood-Shaio, Bogotá, Colombia. Address: Dg 115a # 70c-75. Phone number: (571) 593 8210.

<sup>4</sup> Grupo de Inmunobiología y Biología Celular, Facultad de Ciencias, Pontificia Universidad Javeriana, Bogotá, Colombia. Address: Carrera 7 No. 43-82 – Building Carlos Ortíz. Phone number: (571) 320 8320 Ext. 4060 – 4134.

<sup>5</sup> Laboratorio de Parasitología Molecular, Facultad de Ciencias, Pontificia Universidad Javeriana, Bogotá, Colombia. Address: Carrera 7 No. 43-82 - Building Carlos Ortíz. Phone number: (571) 320 8320 Ext. 4060 – 4134.

<sup>#a</sup> Current address: INSERM UMRS872, Cancer, Immune Control and Escape, Cordeliers  
Research Center, Paris, France.

**\* Corresponding author:**

John Mario González MD, PhD. School of Medicine, Universidad de los Andes, Bogotá

D.C. Cra 1 # 18A-12. Zip code: 111711. Phone Number: 57 (1) 3394949 ext. 3900.

E-mail: [johgonza@uniandes.edu.co](mailto:johgonza@uniandes.edu.co) (JMG)

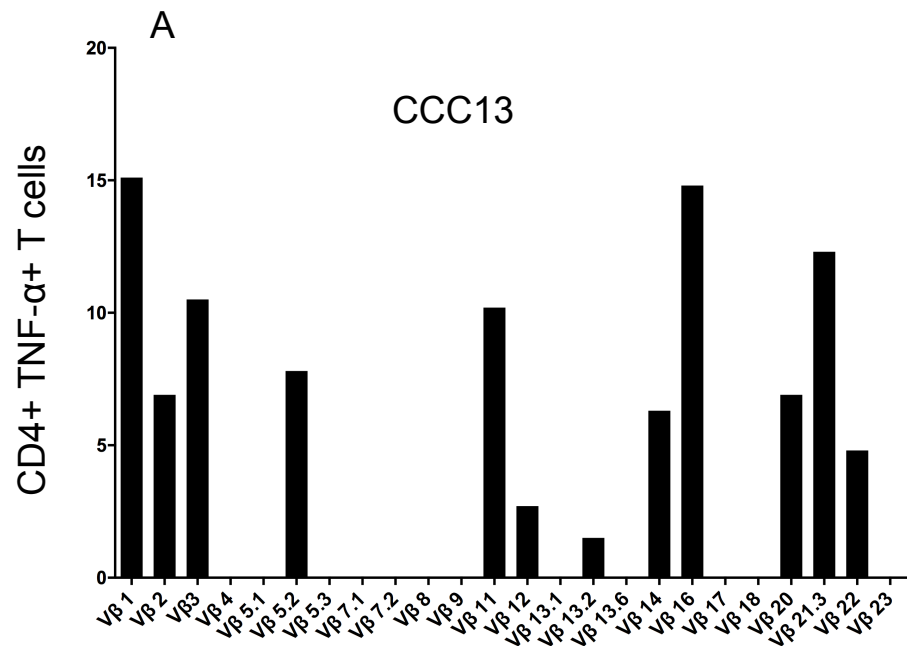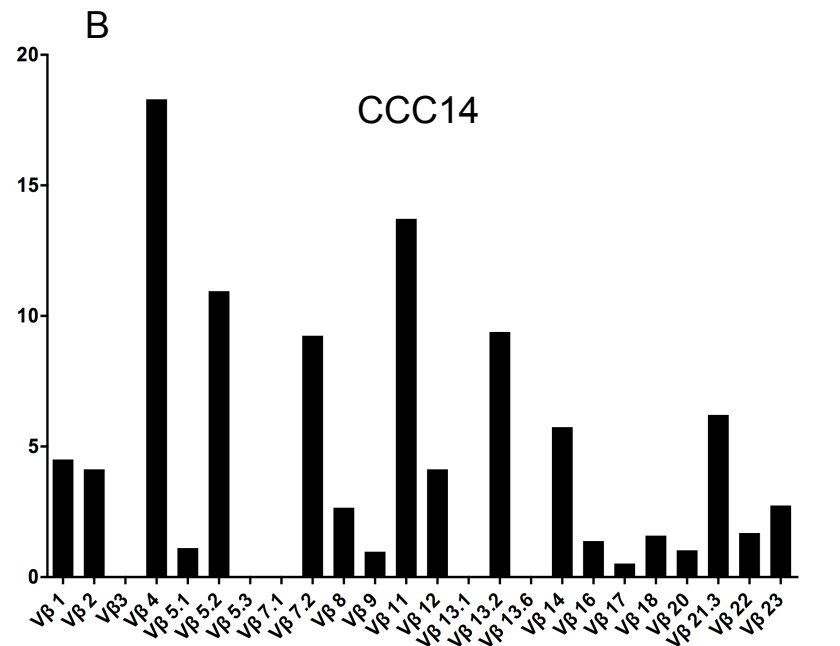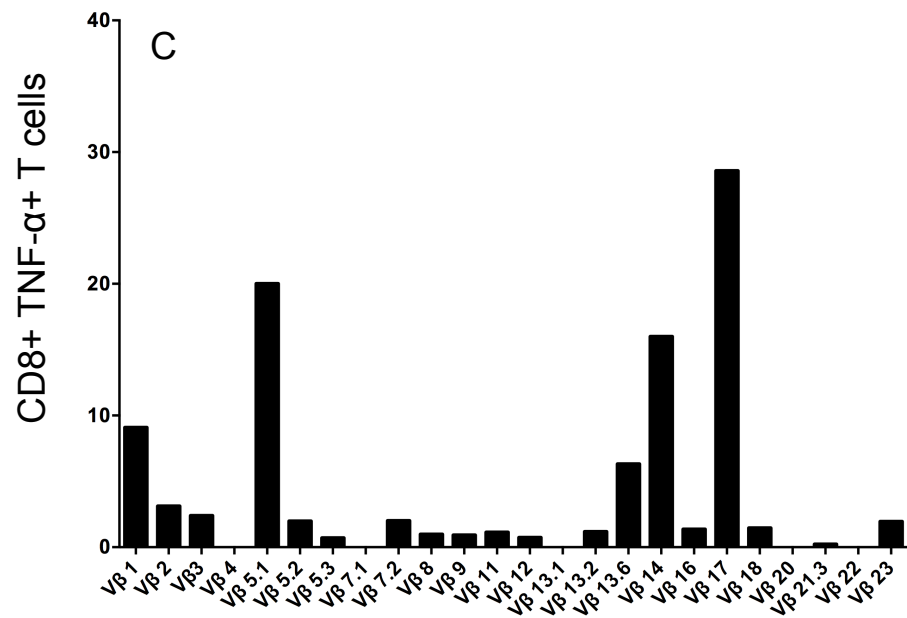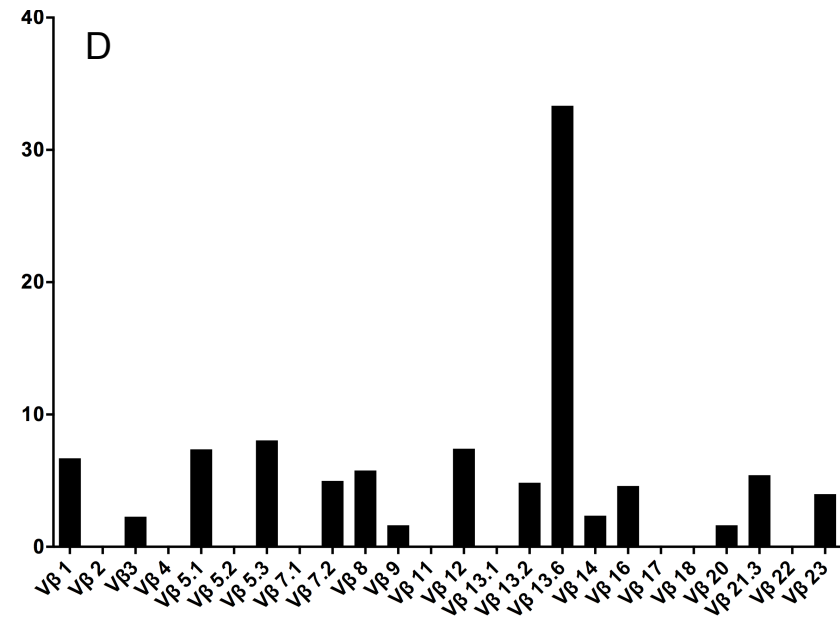

**Figure S2. Percentages of TCR-V $\beta$  families used by T cell subsets producing TNF- $\alpha$  in response to *T. cruzi* lysate in two patients with chronic chagasic cardiomyopathy.**

Percentage of membrane TNF- $\alpha$  expression in CD4<sup>+</sup> (A and B) and CD8<sup>+</sup> T cells (C and D) for each TCR-V $\beta$  family. Population is gated on CD3<sup>+</sup>CD4<sup>+</sup>/TNF- $\alpha$ <sup>+</sup> and CD3<sup>+</sup>CD8<sup>+</sup>/TNF- $\alpha$ <sup>+</sup>, respectively. CCC= chronic chagasic cardiomyopathy.
