# Supplementary material for: T cells responding to Trypanosoma cruzi detected by membrane TNF‐α and CD154 in chagasic patients
Source: PubMed Central journal article supplement (PMC5818450; doi:10.1002/iid3.197), 2017-10-01
Supplement: IID3-6-47-s003.pdf [file IID3-6-47-s003.pdf]

**T cells responding to *T. cruzi* detected by membrane TNF- $\alpha$  and CD154 in chagasic patients**

Juan G. Ripoll<sup>1</sup>, Nicolás A. Giraldo<sup>1#a</sup>, Natalia I. Bolaños<sup>1</sup>, Nubia Roa<sup>2</sup>, Fernando Rosas<sup>3</sup>, Adriana Cuéllar<sup>4</sup>, Concepción J. Puerta<sup>5</sup>, John M. González<sup>1\*</sup>

<sup>1</sup> Grupo de Ciencias Básicas Médicas, Facultad de Medicina, Universidad de los Andes, Bogotá, Colombia. Address: Cra 1 # 18A-12. Phone Number: (571) 3394949 Ext. 3900.

<sup>2</sup> Facultad de Medicina, Pontificia Universidad Javeriana and Hospital Universitario San Ignacio, Bogotá, Colombia. Address: Cra. 7 No. 40-62. Phone number: (571) 320 8320 Ext. 2745 – 2777.

<sup>3</sup> Clínica Abood-Shaio, Bogotá, Colombia. Address: Dg 115a # 70c-75. Phone number: (571) 593 8210.

<sup>4</sup> Grupo de Inmunobiología y Biología Celular, Facultad de Ciencias, Pontificia Universidad Javeriana, Bogotá, Colombia. Address: Carrera 7 No. 43-82 – Building Carlos Ortíz. Phone number: (571) 320 8320 Ext. 4060 – 4134.

<sup>5</sup> Laboratorio de Parasitología Molecular, Facultad de Ciencias, Pontificia Universidad Javeriana, Bogotá, Colombia. Address: Carrera 7 No. 43-82 - Building Carlos Ortíz. Phone number: (571) 320 8320 Ext. 4060 – 4134.

<sup>#a</sup> Current address: INSERM UMRS872, Cancer, Immune Control and Escape, Cordeliers  
Research Center, Paris, France.

**\* Corresponding author:**

John Mario González MD, PhD. School of Medicine, Universidad de los Andes, Bogotá

D.C. Cra 1 # 18A-12. Zip code: 111711. Phone Number: 57 (1) 3394949 ext. 3900.

E-mail: [johgonza@uniandes.edu.co](mailto:johgonza@uniandes.edu.co) (JMG)

**Table S1. Comparison of membrane TNF- $\alpha$  and CD154 expression among *ex vivo* and frozen cells.**

| <b>Asymptomatic Chagasic Patients</b>               |                     |                     |          |                     |                     |         |
|-----------------------------------------------------|---------------------|---------------------|----------|---------------------|---------------------|---------|
| <b><i>T. cruzi</i> lysate Stimulus</b>              |                     |                     |          |                     |                     |         |
|                                                     | CD4+ T cells        |                     | P- value | CD8+ T cells        |                     | P-value |
|                                                     | <i>Ex vivo</i>      | Frozen              |          | <i>Ex vivo</i>      | Frozen              |         |
| mTNF- $\alpha$ +<br>expression<br>(Median & IQR, %) | 1.90<br>(1.23-1.91) | 1.76<br>(1.4-2.15)  | 0.99     | 2.16<br>(2.07-2.74) | 2.08<br>(1.87-2.26) | 0.56    |
| CD154 expression<br>(Median & IQR, %)               | 1.18<br>(1.04-1.40) | 1.02<br>(0.54-1.61) | 0.55     | 1.02<br>(0.65-1.07) | 1.02<br>(0.65-1.07) | 0.89    |

| <b>Symptomatic Chagasic Patients</b>                |                     |                     |          |                     |                     |         |
|-----------------------------------------------------|---------------------|---------------------|----------|---------------------|---------------------|---------|
| <b><i>T. cruzi</i> lysate Stimulus</b>              |                     |                     |          |                     |                     |         |
|                                                     | CD4+ T cells        |                     | P- value | CD8+ T cells        |                     | P-value |
|                                                     | <i>Ex vivo</i>      | Frozen              |          | <i>Ex vivo</i>      | Frozen              |         |
| mTNF- $\alpha$ +<br>expression<br>(Median & IQR, %) | 1.82<br>(1.36-2.86) | 1.55<br>(1.26-1.66) | 0.37     | 4.05<br>(2.27-4.83) | 3.59<br>(3.14-3.75) | 0.88    |
| CD154 expression<br>(Median & IQR, %)               | 2.91<br>(1.82-3.79) | 2.31<br>(2.06-4.13) | >0.99    | 1.77<br>(0.97-1.93) | 1.26<br>(1.11-1.62) | 0.98    |

| <b>Healthy Controls</b>                             |                     |                     |         |                     |                     |         |
|-----------------------------------------------------|---------------------|---------------------|---------|---------------------|---------------------|---------|
| <b><i>T. cruzi</i> lysate Stimulus</b>              |                     |                     |         |                     |                     |         |
|                                                     | CD4+ T cells        |                     | P-value | CD8+ T cells        |                     | P-value |
|                                                     | <i>Ex vivo</i>      | Frozen              |         | <i>Ex vivo</i>      | Frozen              |         |
| mTNF- $\alpha$ +<br>expression<br>(Median & IQR, %) | 0.42<br>(0.35-0.63) | 0.41<br>(0.31-0.47) | 0.65    | 0.70<br>(0.55-0.74) | 0.32<br>(0.26-0.51) | 0.50    |
| CD154 expression<br>(Median & IQR, %)               | 0.10<br>(0.05-0.14) | 0.07<br>(0.06-0.10) | 0.99    | 0.19<br>(0.11-0.46) | 0.14<br>(0.11-0.24) | 0.64    |

P-value obtained by Mann-Whitney analysis
