# Supplementary material for: T cells responding to Trypanosoma cruzi detected by membrane TNF‐α and CD154 in chagasic patients
Source: PubMed Central journal article supplement (PMC5818450; doi:10.1002/iid3.197), 2017-10-01
Supplement: IID3-6-47-s004.pdf [file IID3-6-47-s004.pdf]

**T cells responding to *T. cruzi* detected by membrane TNF- $\alpha$  and CD154 in chagasic patients**

Juan G. Ripoll<sup>1</sup>, Nicolás A. Giraldo<sup>1#a</sup>, Natalia I. Bolaños<sup>1</sup>, Nubia Roa<sup>2</sup>, Fernando Rosas<sup>3</sup>, Adriana Cuéllar<sup>4</sup>, Concepción J. Puerta<sup>5</sup>, John M. González<sup>1\*</sup>

<sup>1</sup> Grupo de Ciencias Básicas Médicas, Facultad de Medicina, Universidad de los Andes, Bogotá, Colombia. Address: Cra 1 # 18A-12. Phone Number: (571) 3394949 Ext. 3900.

<sup>2</sup> Facultad de Medicina, Pontificia Universidad Javeriana and Hospital Universitario San Ignacio, Bogotá, Colombia. Address: Cra. 7 No. 40-62. Phone number: (571) 320 8320 Ext. 2745 – 2777.

<sup>3</sup> Clínica Abood-Shaio, Bogotá, Colombia. Address: Dg 115a # 70c-75. Phone number: (571) 593 8210.

<sup>4</sup> Grupo de Inmunobiología y Biología Celular, Facultad de Ciencias, Pontificia Universidad Javeriana, Bogotá, Colombia. Address: Carrera 7 No. 43-82 – Building Carlos Ortíz. Phone number: (571) 320 8320 Ext. 4060 – 4134.

<sup>5</sup> Laboratorio de Parasitología Molecular, Facultad de Ciencias, Pontificia Universidad Javeriana, Bogotá, Colombia. Address: Carrera 7 No. 43-82 - Building Carlos Ortíz. Phone number: (571) 320 8320 Ext. 4060 – 4134.

<sup>#a</sup> Current address: INSERM UMRS872, Cancer, Immune Control and Escape, Cordeliers  
Research Center, Paris, France.

**\* Corresponding author:**

John Mario González MD, PhD. School of Medicine, Universidad de los Andes, Bogotá

D.C. Cra 1 # 18A-12. Zip code: 111711. Phone Number: 57 (1) 3394949 ext. 3900.

E-mail: [johgonza@uniandes.edu.co](mailto:johgonza@uniandes.edu.co) (JMG)

**Table S2. Membrane TNF $\alpha$  and CD154 expression in T cell subsets after *T. cruzi* lysate stimulation.**

|                                                      | Membrane TNF- $\alpha$ expression with <i>T. cruzi</i> lysate |                                  |                  |                     |                                |                  |
|------------------------------------------------------|---------------------------------------------------------------|----------------------------------|------------------|---------------------|--------------------------------|------------------|
|                                                      | Asymptomatic<br>Chagasic patients                             | Symptomatic<br>Chagasic patients | $\Delta$ P-value | Healthy controls    | Non-chagasic<br>cardiomyopathy | $\Omega$ P-value |
| CD4+ T cells %<br>(Median & IQR) #                   | 1.90<br>(1.23-2.03)                                           | 1.66<br>(1.21-2.13)              | 0.7939           | 0.42<br>(0.32-0.53) | 0.74<br>(0.68-1.06)            | <0.0001*         |
| CD8+ T cells                                         | 2.10<br>(2.05-2.74)                                           | 3.67<br>(2.58-4.07)              | 0.0148*          | 0.55<br>(0.28-0.72) | 0.84<br>(0.60-1.22)            | <0.0001*         |
| CD154 (CD40L) expression with <i>T. cruzi</i> lysate |                                                               |                                  |                  |                     |                                |                  |
| CD4+ T cells %<br>(Median & IQR)                     | 1.05<br>(1.02-1.61)                                           | 2.87<br>(1.82-4.10)              | 0.0148*          | 0.07<br>(0.06-0.13) | 0.09<br>(0.07-0.12)            | <0.0001*         |
| CD8+ T cells                                         | 1.07<br>(0.89-1.27)                                           | 1.44<br>(1.06-1.89)              | 0.1694           | 0.16<br>(0.12-0.36) | 0.30<br>(0.21-0.46)            | <0.0001*         |

# Data are shown as median and interquartile range (IQR)

$\Delta$  Comparisons between asymptomatic and symptomatic chagasic patients were done using the Mann-Whitney U-test.

$\Omega$  Comparisons between all groups were done using Kruskal-Wallis test.

\* Statistically significant, P-value < 0.05.
